# Supplementary material for: Small Extracellular Vesicle-Derived microRNAs Stratify Prostate Cancer Patients According to Gleason Score, Race and Associate with Survival of African American and Caucasian Men
Source: MDPI journal article supplement (doi:10.3390/cancers13205236), 2021-10-19

## Supplementary Information

### **Small extracellular vesicles-derived microRNAs stratify prostate cancer patients according to Gleason score, race and associate with survival of African American and Caucasian men**

Hamdy E.A. Ali<sup>1</sup>, Mohamed S.A. Gaballah<sup>1,2</sup>, Rofaida Gaballa<sup>1</sup>, Shahenda Mahgoub<sup>2</sup>, Zeinab A. Hassan<sup>2</sup>, Eman Toraih<sup>3</sup>, Bettina F. Drake<sup>4</sup>, Zakaria Y. Abd Elmageed<sup>1, 5#</sup>

<sup>1</sup> Department of Pharmaceutical Sciences, Rangel College of Pharmacy, Texas A&M University, College Station, TX 77843, USA

<sup>2</sup> Department of Radiobiological Applications, Nuclear Research Center, Atomic Energy Authority, Cairo, Egypt

<sup>3</sup> Department of Biochemistry and Molecular Biology, Faculty of Pharmacy, Helwan University, Cairo 11795, Egypt

<sup>4</sup> Department of Surgery, Tulane University School of Medicine, 1430 Tulane Avenue, New Orleans, LA 70112, USA

<sup>5</sup> Division of Public Health Sciences, Washington University School of Medicine, Saint Louis, MO 63110, USA

<sup>6</sup> Department of Pharmacology, Edward Via College of Osteopathic Medicine, University of Louisiana at Monroe, Monroe, LA 71203, USA

Running Title: Small extracellular vesicle-associated miRs as diagnostic and prognostic markers in prostate cancer

#Correspondence to:

Zakaria Y. Abd Elmageed, PhD

Department of Pharmacology  
Edward Via College of Osteopathic Medicine  
University of Louisiana at Monroe  
4408 Bon Aire Drive  
Monroe, LA 71203  
Phone: 318-342-7185  
Email: zelmageed@ulm.vcom.edu

**Table S1.** List of blood samples collected from PCa and race-matched healthy individuals for conducting sEV-associated miR profiling

| Group               | 1. Age     |                  | Race | PSA<br>Mean $\pm$ | Stage | GS |
|---------------------|------------|------------------|------|-------------------|-------|----|
|                     | Individual | Mean $\pm$ SD    |      |                   |       |    |
| Group 1 (PCa)       | 45         | 53.20 $\pm$ 8.01 | CA   | 9.4 $\pm$ 5.96    | pT2c  | 6  |
|                     | 55         |                  |      |                   | pT2c  | 6  |
|                     | 49         |                  |      |                   | pT2c  | 6  |
|                     | 51         |                  |      |                   | pT2c  | 6  |
|                     | 66         |                  |      |                   | pT2c  | 6  |
|                     | 66         |                  |      |                   | pT2c  | 6  |
| Group 2 (PCa)       | 47         | 53.16 $\pm$ 5.53 | AA   | 7.7 $\pm$ 3.96    | pT2c  | 6  |
|                     | 48         |                  |      |                   | pT2c  | 6  |
|                     | 52         |                  |      |                   | pT2c  | 6  |
|                     | 54         |                  |      |                   | pT3a  | 6  |
|                     | 56         |                  |      |                   | pT2c  | 6  |
|                     | 62         |                  |      |                   | pT2c  | 6  |
| Group 3 (PCa)       | 61         | 65.66 $\pm$ 5.39 | CA   | 15.1 $\pm$ 4.82   | pT3a  | 8  |
|                     | 60         |                  |      |                   | pT2c  | 8  |
|                     | 64         |                  |      |                   | pT3a  | 9  |
|                     | 74         |                  |      |                   | pT3a  | 9  |
|                     | 65         |                  |      |                   | pT4   | 9  |
|                     | 70         |                  |      |                   | pT2c  | 8  |
| Group 4 (PCa)       | 60         | 64.50 $\pm$ 5.99 | AA   | 14.7 $\pm$ 6.14   | pT3a  | 8  |
|                     | 61         |                  |      |                   | pT2c  | 8  |
|                     | 73         |                  |      |                   | pT2c  | 9  |
|                     | 59         |                  |      |                   | pT2c  | 9  |
|                     | 71         |                  |      |                   | pT2c  | 8  |
|                     | 63         |                  |      |                   | pT3a  | 9  |
| Group 5<br>(Normal) | 58         | 56.67 $\pm$ 5.13 | CA   |                   |       |    |
|                     | 54         |                  |      |                   |       |    |
|                     | 62         |                  |      |                   |       |    |
|                     | 63         |                  |      |                   |       |    |
|                     | 51         |                  |      |                   |       |    |
|                     | 52         |                  |      |                   |       |    |
| Group 6             | 57         | 56.83 $\pm$ 3.13 | AA   |                   |       |    |
|                     | 53         |                  |      |                   |       |    |

|  |    |  |  |  |  |  |
|--|----|--|--|--|--|--|
|  | 59 |  |  |  |  |  |
|  | 59 |  |  |  |  |  |
|  | 53 |  |  |  |  |  |
|  | 60 |  |  |  |  |  |

AA: African American; CA: Caucasian American; GS: Gleason score; SD: standard deviation

**Table S2.** Clinical information of PCa samples and their age and race-matched healthy individuals (confirmatory cohorts)

| Variable                                     | Washington Cohort |              |               |               | NIH Cohort      |                 |
|----------------------------------------------|-------------------|--------------|---------------|---------------|-----------------|-----------------|
|                                              | Normal            |              | PCa           |               | PCa             |                 |
|                                              | AA                | CA           | AA            | CA            | AA              | CA              |
| <b>Total, n</b>                              | 15                | 15           | 30            | 30            | 45              | 45              |
| <b>Age, mean <math>\pm</math> SD (Y)</b>     | 56 $\pm$ 5.3      | 57 $\pm$ 3.4 | 61 $\pm$ 9.2  | 62 $\pm$ 8.8  | 64 $\pm$ 7.08   | 64 $\pm$ 6.96   |
| <b>PSA, mean <math>\pm</math> SD (ng/ml)</b> |                   |              | 6.9 $\pm$ 3.4 | 8.6 $\pm$ 6.7 | 13.4 $\pm$ 16.5 | 12.3 $\pm$ 22.3 |
| <b>Gleason score (n)</b>                     |                   |              |               |               |                 |                 |
| <b>GS &lt;7</b>                              |                   |              | 15            | 15            | 15              | 15              |
| <b>GS=7</b>                                  |                   |              | 0             | 0             | 15              | 15              |
| <b>GS&gt;7</b>                               |                   |              | 15            | 15            | 15              | 15              |
| <b>Clinical stage (n)</b>                    |                   |              |               |               |                 |                 |
| <b>T1c</b>                                   |                   |              | 26            | 20            | 5               | 6               |
| <b>T2a</b>                                   |                   |              | 3             | 6             | 9               | 7               |
| <b>T2b</b>                                   |                   |              | 0             | 0             | 21              | 20              |
| <b>T2c</b>                                   |                   |              | 0             | 1             | 0               | 0               |
| <b>T3a</b>                                   |                   |              | 0             | 0             | 6               | 9               |
| <b>T3b</b>                                   |                   |              | 0             | 0             | 0               | 0               |
| <b>T4</b>                                    |                   |              | 0             | 0             | 4               | 3               |
| <b>Smoke Status</b>                          |                   |              |               |               |                 |                 |
| <b>Never</b>                                 |                   |              | 10            | 15            | 14              | 17              |
| <b>Current</b>                               |                   |              | 7             | 0             | 16              | 10              |
| <b>Former</b>                                |                   |              | 12            | 13            | 15              | 18              |

AA: African American; CA: Caucasian American

**Table S3.** qNano analysis for measuring the size and concentration of small extracellular vesicles (sEVs) derived from plasma of PCa patients.

| Samples | Experiment | Particle diameter (nm) |      |       | Concentration (particles/mL) |                     |
|---------|------------|------------------------|------|-------|------------------------------|---------------------|
|         |            | Mean                   | SD   | Mode  | Measured                     | Final Concentration |
| AA-LGS  | Repeat-1   | 154                    | 63.1 | 110   | 8.21E+10                     | 1.64E+11            |
|         | Repeat-2   | 151                    | 60   | 95    | 6.72E+10                     | 1.34E+11            |
|         | Average    | 152.5                  | 61.6 | 102.5 | 7.47E+10                     | 1.49E+11            |
| AA-HGS  | Repeat-1   | 161                    | 70.4 | 100   | 1.25E+11                     | 2.51E+11            |
|         | Repeat-2   | 156                    | 68.6 | 122   | 1.13E+11                     | 2.26E+11            |
|         | Average    | 158.5                  | 69.5 | 111.0 | 1.19E+11                     | 2.385E+11           |
| CA-LGS  | Repeat-1   | 162                    | 65.5 | 96    | 1.30E+11                     | 2.59E+11            |
|         | Repeat-2   | 151                    | 61.4 | 98    | 8.38E+10                     | 1.68E+11            |
|         | Average    | 156.5                  | 63.5 | 97    | 1.069E+11                    | 2.135E+11           |
| CA-HGS  | Repeat-1   | 145                    | 55.2 | 128   | 6.87E+10                     | 1.37E+11            |
|         | Repeat-2   | 151                    | 57.8 | 110   | 4.92E+10                     | 9.84E+10            |
|         | Average    | 148.0                  | 56.5 | 119   | 5.90E+10                     | 1.177E+11           |

AA-HGS: AA men with high Gleason score; CA-HGS: CA men with high Gleason score

AA-LGS: AA men with low Gleason score; CA-LGS: CA men with low Gleason score

**Table S4.** miR profiling of small extracellular vesicles (sEVs) collected from plasma of PCa patients compared to normal individuals, AA compared to CA PCa and high Gleason score compared to low Gleason score when fold change at 1.5 was considered.

| #                                         | sEVs-miR     | FC    | p-value | FDR-   | #   | sEVs-miR     | FC  | p-    | FDR-   |
|-------------------------------------------|--------------|-------|---------|--------|-----|--------------|-----|-------|--------|
| <b>A. PCa compared to normal subjects</b> |              |       |         |        |     |              |     |       |        |
| 1                                         | miR-4529-3p  | 354.7 | 0.0000  | 0.0001 | 94  | ENSG00000202 | 1.8 | 0.016 | 0.7926 |
| 2                                         | miR-3201     | 30.6  | 0.0000  | 0.0013 | 95  | miR-489-3p   | 1.8 | 0.047 | 0.9574 |
| 3                                         | miR-8084     | 28.5  | 0.0000  | 0.0001 | 96  | miR-575      | 1.8 | 0.003 | 0.3971 |
| 4                                         | miR-486-5p   | 21.5  | 0.0002  | 0.0801 | 97  | ENSG00000238 | 1.8 | 0.032 | 0.8806 |
| 5                                         | miR-26a-5p   | 21.4  | 0.0000  | 0.007  | 98  | mir-4775     | 1.7 | 0.003 | 0.4123 |
| 6                                         | miR-92a-3p   | 14.5  | 0.0001  | 0.0502 | 99  | miR-6746-5p  | 1.7 | 0.010 | 0.6765 |
| 7                                         | miR-23a-3p   | 13.8  | 0.0008  | 0.1727 | 100 | mir-548g     | 1.7 | 0.015 | 0.7721 |
| 8                                         | let-7b-5p    | 13.7  | 0.0174  | 0.8032 | 101 | ENSG00000253 | 1.7 | 0.000 | 0.1526 |
| 9                                         | mir-7515     | 12.5  | 0.0000  | 0.0037 | 102 | ENSG00000212 | 1.7 | 0.018 | 0.8322 |
| 10                                        | miR-16-5p    | 12.3  | 0.0000  | 0.0014 | 103 | miR-6877-5p  | 1.7 | 0.023 | 0.8767 |
| 11                                        | miR-6716-3p  | 12.0  | 0.0148  | 0.7721 | 104 | miR-509-3-5p | 1.7 | 0.036 | 0.8924 |
| 12                                        | miR-126-3p   | 10.9  | 0.0000  | 0.0111 | 105 | miR-548x-3p  | 1.7 | 0.004 | 0.4217 |
| 13                                        | miR-320c     | 10.1  | 0.0001  | 0.0694 | 106 | ENSG00000252 | 1.7 | 0.021 | 0.8767 |
| 14                                        | miR-3128     | 9.7   | 0.0002  | 0.0801 | 107 | miR-378a-3p  | 1.7 | 0.001 | 0.2835 |
| 15                                        | miR-320a     | 8.2   | 0.0017  | 0.2835 | 108 | mir-181b-2   | 1.7 | 0.002 | 0.3737 |
| 16                                        | miR-8075     | 7.5   | 0.0003  | 0.0937 | 109 | miR-27a-3p   | 1.7 | 0.025 | 0.8767 |
| 17                                        | miR-320b     | 7.2   | 0.0018  | 0.3023 | 110 | ENSG00000238 | 1.7 | 0.002 | 0.3615 |
| 18                                        | miR-23b-3p   | 6.8   | 0.0000  | 0.0108 | 111 | U83B         | 1.7 | 0.009 | 0.6487 |
| 19                                        | miR-103a-3p  | 6.1   | 0.0000  | 0.0067 | 112 | miR-151a-5p  | 1.7 | 0.015 | 0.7747 |
| 20                                        | let-7a-5p    | 5.4   | 0.0001  | 0.0502 | 113 | mir-3910-1   | 1.7 | 0.018 | 0.8312 |
| 21                                        | miR-619-5p   | 5.3   | 0.0000  | 0.0067 | 114 | mir-6816     | 1.7 | 0.019 | 0.8322 |
| 22                                        | miR-320d     | 5.2   | 0.0004  | 0.1242 | 115 | miR-4291     | 1.7 | 0.034 | 0.8924 |
| 23                                        | mir-6798     | 5.2   | 0.0374  | 0.8924 | 116 | miR-4804-5p  | 1.7 | 0.042 | 0.9059 |
| 24                                        | ENSG00000252 | 4.5   | 0.0464  | 0.9493 | 117 | miR-4478     | 1.7 | 0.013 | 0.7638 |
| 25                                        | miR-4445-3p  | 4.4   | 0.0033  | 0.3971 | 118 | mir-24-1     | 1.7 | 0.014 | 0.7721 |
| 26                                        | mir-520g     | 4.2   | 0.0002  | 0.0743 | 119 | miR-93-5p    | 1.7 | 0.035 | 0.8924 |
| 27                                        | mir-520h     | 4.2   | 0.0002  | 0.0743 | 120 | U57          | 1.7 | 0.014 | 0.7718 |
| 28                                        | miR-107      | 4.1   | 0.0016  | 0.2835 | 121 | ENSG00000252 | 1.7 | 0.026 | 0.8767 |
| 29                                        | miR-6514-3p  | 3.8   | 0.0404  | 0.8933 | 122 | ACA4         | 1.7 | 0.032 | 0.8806 |
| 30                                        | ENSG00000252 | 3.7   | 0.0146  | 0.7721 | 123 | ENSG00000207 | 1.6 | 0.005 | 0.514  |
| 31                                        | mir-4275     | 3.6   | 0.0094  | 0.6487 | 124 | ENSG00000238 | 1.6 | 0.002 | 0.3615 |
| 32                                        | miR-150-5p   | 3.6   | 0.0014  | 0.2697 | 125 | miR-200b-5p  | 1.6 | 0.008 | 0.6403 |
| 33                                        | miR-24-3p    | 3.5   | 0.0058  | 0.5311 | 126 | miR-4671-5p  | 1.6 | 0.020 | 0.8767 |
| 34                                        | ENSG00000252 | 3.4   | 0.0391  | 0.8924 | 127 | hsa-miR-4784 | 1.6 | 0.024 | 0.8767 |
| 35                                        | HBII-85-8    | 3.3   | 0.0055  | 0.514  | 128 | miR-197-3p   | 1.6 | 0.008 | 0.6361 |
| 36                                        | mir-365a     | 3.2   | 0.0365  | 0.8924 | 129 | ENSG00000238 | 1.6 | 0.013 | 0.7564 |
| 37                                        | mir-365a     | 3.2   | 0.0305  | 0.8767 | 130 | miR-4779     | 1.6 | 0.019 | 0.8424 |
| 38                                        | miR-342-3p   | 2.9   | 0.0015  | 0.2827 | 131 | ENSG00000253 | 1.6 | 0.023 | 0.8767 |

|    |              |     |        |        |     |              |      |       |        |
|----|--------------|-----|--------|--------|-----|--------------|------|-------|--------|
| 39 | miR-335-5p   | 2.9 | 0.0051 | 0.5024 | 132 | HBII-289     | 1.6  | 0.003 | 0.4123 |
| 40 | ENSG00000252 | 2.7 | 0.0038 | 0.4123 | 133 | mir-4466     | 1.6  | 0.027 | 0.8767 |
| 41 | let-7d-5p    | 2.7 | 0.0063 | 0.5624 | 134 | miR-4258     | 1.6  | 0.002 | 0.3551 |
| 42 | miR-1182     | 2.7 | 0.0214 | 0.8767 | 135 | miR-5681a    | 1.6  | 0.010 | 0.6669 |
| 43 | miR-3151-5p  | 2.6 | 0.0087 | 0.6403 | 136 | mir-532      | 1.6  | 0.029 | 0.8767 |
| 44 | miR-8060     | 2.6 | 0.0006 | 0.1526 | 137 | ENSG00000252 | 1.6  | 0.005 | 0.5024 |
| 45 | miR-4644     | 2.6 | 0.0093 | 0.6487 | 138 | mir-620      | 1.6  | 0.035 | 0.8924 |
| 46 | let-7c-5p    | 2.6 | 0.0004 | 0.1242 | 139 | miR-6735-5p  | 1.6  | 0.043 | 0.9062 |
| 47 | miR-606      | 2.5 | 0.0002 | 0.0801 | 140 | miR-4704-5p  | 1.6  | 0.003 | 0.4164 |
| 48 | miR-4454     | 2.5 | 0.0181 | 0.8231 | 141 | miR-5695     | 1.6  | 0.029 | 0.8767 |
| 49 | HBII-85-6    | 2.5 | 0.0183 | 0.8272 | 142 | spike_in-    | 1.6  | 0.009 | 0.6622 |
| 50 | miR-330-3p   | 2.4 | 0.0024 | 0.3581 | 143 | gi:555853    | 1.6  | 0.026 | 0.8767 |
| 51 | HBII-85-2    | 2.4 | 0.0003 | 0.0857 | 144 | ENSG00000251 | 1.5  | 0.006 | 0.5666 |
| 52 | miR-6752-5p  | 2.4 | 0.0028 | 0.3737 | 145 | ENSG00000265 | 1.5  | 0.006 | 0.5666 |
| 53 | miR-3910     | 2.4 | 0.0170 | 0.7934 | 146 | ENSG00000201 | 1.5  | 0.024 | 0.8767 |
| 54 | miR-1275     | 2.4 | 0.0033 | 0.3971 | 147 | miR-222-5p   | 1.5  | 0.027 | 0.8767 |
| 55 | miR-1288-5p  | 2.3 | 0.0226 | 0.8767 | 148 | miR-3200-3p  | 1.5  | 0.034 | 0.8924 |
| 56 | miR-4690-5p  | 2.3 | 0.0001 | 0.0502 | 149 | mir-3127     | 1.5  | 0.002 | 0.3902 |
| 57 | miR-423-5p   | 2.3 | 0.0103 | 0.6708 | 150 | miR-922      | 1.5  | 0.005 | 0.5024 |
| 58 | miR-6780b-5p | 2.3 | 0.0263 | 0.8767 | 151 | miR-4797-5p  | 1.5  | 0.003 | 0.3971 |
| 59 | miR-2392     | 2.2 | 0.0041 | 0.4217 | 152 | ENSG00000201 | 1.5  | 0.009 | 0.6487 |
| 60 | miR-6801-5p  | 2.2 | 0.0206 | 0.8767 | 153 | miR-718      | 1.5  | 0.009 | 0.6487 |
| 61 | miR-3074-3p  | 2.2 | 0.0345 | 0.8924 | 154 | ENSG00000238 | 1.5  | 0.032 | 0.8806 |
| 62 | miR-6807-5p  | 2.1 | 0.0024 | 0.3581 | 155 | ENSG00000238 | -1.5 | 0.032 | 0.8806 |
| 63 | ENSG00000252 | 2.1 | 0.0007 | 0.158  | 156 | 14qII-20     | -1.5 | 0.008 | 0.6361 |
| 64 | miR-19b-3p   | 2.1 | 0.0115 | 0.6907 | 157 | mir-1208     | -1.5 | 0.036 | 0.8924 |
| 65 | mir-338      | 2.1 | 0.0030 | 0.3928 | 158 | ENSG00000212 | -1.6 | 0.031 | 0.8806 |
| 66 | miR-4423-3p  | 2.0 | 0.0055 | 0.514  | 159 | miR-4492     | -1.6 | 0.010 | 0.6765 |
| 67 | miR-548ac    | 2.0 | 0.0041 | 0.4217 | 160 | miR-1178-5p  | -1.6 | 0.032 | 0.8806 |
| 68 | ACA1         | 2.0 | 0.0307 | 0.8767 | 161 | ENSG00000200 | -1.6 | 0.024 | 0.8767 |
| 69 | ENSG00000199 | 2.0 | 0.0307 | 0.8767 | 162 | miR-6075     | -1.6 | 0.023 | 0.8767 |
| 70 | mir-3128     | 2.0 | 0.0002 | 0.0801 | 163 | mir-1181     | -1.7 | 0.029 | 0.8767 |
| 71 | mir-4753     | 2.0 | 0.0108 | 0.6765 | 164 | mir-6858     | -1.7 | 0.010 | 0.6669 |
| 72 | HBII-85-26   | 2.0 | 0.0405 | 0.8933 | 165 | miR-211-3p   | -1.9 | 0.027 | 0.8767 |
| 73 | miR-6820-5p  | 2.0 | 0.0403 | 0.8933 | 166 | mir-550a-1   | -1.9 | 0.047 | 0.953  |
| 74 | mir-8075     | 2.0 | 0.0355 | 0.8924 | 167 | mir-550a-2   | -1.9 | 0.047 | 0.953  |
| 75 | miR-204-3p   | 2.0 | 0.0365 | 0.8924 | 168 | mir-550a-3   | -1.9 | 0.047 | 0.953  |
| 76 | miR-8054     | 1.9 | 0.0006 | 0.1558 | 169 | ENSG00000251 | -1.9 | 0.008 | 0.6403 |
| 77 | ENSG00000238 | 1.9 | 0.0010 | 0.1941 | 170 | miR-4739     | -2.1 | 0.012 | 0.7386 |
| 78 | mir-1260a    | 1.9 | 0.0252 | 0.8767 | 171 | mir-6722     | -2.1 | 0.028 | 0.8767 |
| 79 | ENSG00000202 | 1.9 | 0.0007 | 0.158  | 172 | miR-6511b-5p | -2.2 | 0.041 | 0.8981 |
| 80 | let-7i-5p    | 1.9 | 0.0076 | 0.6266 | 173 | miR-1281     | -2.4 | 0.000 | 0.1623 |
| 81 | mir-640      | 1.9 | 0.0232 | 0.8767 | 174 | miR-6511a-5p | -2.4 | 0.046 | 0.9493 |
| 82 | miR-3622a-5p | 1.9 | 0.0235 | 0.8767 | 175 | miR-4745-5p  | -2.5 | 0.013 | 0.7621 |

|                                          |                    |     |        |        |     |                    |       |       |        |
|------------------------------------------|--------------------|-----|--------|--------|-----|--------------------|-------|-------|--------|
| 83                                       | miR-4684-3p        | 1.8 | 0.0238 | 0.8767 | 176 | miR-6791-5p        | -2.6  | 0.033 | 0.8877 |
| 84                                       | mir-4679-1         | 1.8 | 0.0011 | 0.2062 | 177 | miR-6732-5p        | -2.8  | 0.047 | 0.9574 |
| 85                                       | miR-3177-3p        | 1.8 | 0.0495 | 0.9675 | 178 | miR-6800-5p        | -3.2  | 0.007 | 0.6192 |
| 86                                       | mir-4512           | 1.8 | 0.0095 | 0.6487 | 179 | miR-6789-5p        | -3.8  | 0.010 | 0.6765 |
| 87                                       | U26                | 1.8 | 0.0285 | 0.8767 | 180 | miR-4516           | -4.6  | 0.014 | 0.7718 |
| 88                                       | ENSG00000252       | 1.8 | 0.0034 | 0.3971 | 181 | miR-6869-5p        | -6.4  | 0.030 | 0.8767 |
| 89                                       | ENSG00000252       | 1.8 | 0.0022 | 0.3551 | 182 | <b>miR-6068</b>    | -8.2  | 0.003 | 0.4123 |
| 90                                       | ENSG00000253       | 1.8 | 0.0236 | 0.8767 | 183 | miR-4487           | -8.5  | 0.021 | 0.8767 |
| 91                                       | miR-25-3p          | 1.8 | 0.0008 | 0.1623 | 184 | <b>miR-5001-5p</b> | -12.6 | 0.002 | 0.3615 |
| 92                                       | mir-6765           | 1.8 | 0.0073 | 0.6223 | 185 | miR-4467           | -25.5 | 0.012 | 0.7374 |
| 93                                       | mir-6765           | 1.8 | 0.0073 | 0.6223 |     |                    |       |       |        |
| <b>B. AA compared to CA men with PCa</b> |                    |     |        |        |     |                    |       |       |        |
| 1                                        | <b>miR-6716-5p</b> | 3.4 | 0.0004 | 0.9126 | 52  | U71d               | 1.5   | 0.020 | 0.9527 |
| 2                                        | miR-6510-5p        | 2.6 | 0.0469 | 0.9527 | 53  | miR-93             | 1.5   | 0.034 | 0.9527 |
| 3                                        | miR-3175           | 2.4 | 0.0147 | 0.9527 | 54  | miR-378e           | 1.5   | 0.047 | 0.9527 |
| 4                                        | miR-6743-5p        | 2.3 | 0.0341 | 0.9527 | 55  | U49B               | 1.5   | 0.018 | 0.9527 |
| 5                                        | miR-5004-5p        | 2.2 | 0.0314 | 0.9527 | 56  | miR-152-5p         | -1.5  | 0.012 | 0.9527 |
| 6                                        | miR-4723-5p        | 2.2 | 0.0157 | 0.9527 | 57  | ENSG00000252       | -1.5  | 0.036 | 0.9527 |
| 7                                        | miR-6076           | 2.1 | 0.0103 | 0.9527 | 58  | miR-185            | -1.5  | 0.038 | 0.9527 |
| 8                                        | miR-3944-5p        | 2.0 | 0.0029 | 0.9527 | 59  | miR-1343-3p        | -1.5  | 0.039 | 0.9527 |
| 9                                        | miR-6797-5p        | 2.0 | 0.0004 | 0.9126 | 60  | miR-5588-3p        | -1.5  | 0.043 | 0.9527 |
| 10                                       | miR-524-5p         | 1.9 | 0.0209 | 0.9527 | 61  | miR-218-1-3p       | -1.5  | 0.001 | 0.9527 |
| 11                                       | ENSG00000202       | 1.9 | 0.0064 | 0.9527 | 62  | miR-1291           | -1.5  | 0.013 | 0.9527 |
| 12                                       | miR-4505           | 1.9 | 0.0005 | 0.9126 | 63  | miR-4666a-5p       | -1.5  | 0.014 | 0.9527 |
| 13                                       | miR-520f           | 1.9 | 0.0006 | 0.9126 | 64  | ENSG00000268       | -1.5  | 0.018 | 0.9527 |
| 14                                       | miR-4520b-3p       | 1.9 | 0.0208 | 0.9527 | 65  | U70                | -1.5  | 0.018 | 0.9527 |
| 15                                       | miR-1226-5p        | 1.9 | 0.0209 | 0.9527 | 66  | miR-154-5p         | -1.5  | 0.001 | 0.9527 |
| 16                                       | ENSG00000238       | 1.9 | 0.0222 | 0.9527 | 67  | miR-26a-1          | -1.5  | 0.018 | 0.9527 |
| 17                                       | miR-4486           | 1.8 | 0.0164 | 0.9527 | 68  | miR-636            | -1.5  | 0.038 | 0.9527 |
| 18                                       | miR-7856-5p        | 1.8 | 0.0266 | 0.9527 | 69  | miR-3652           | -1.6  | 0.022 | 0.9527 |
| 19                                       | miR-483-5p         | 1.8 | 0.0097 | 0.9527 | 70  | SNORA38B           | -1.6  | 0.022 | 0.9527 |
| 20                                       | miR-4446           | 1.8 | 0.007  | 0.9527 | 71  | ENSG00000238       | -1.6  | 0.022 | 0.9527 |
| 21                                       | ENSG00000253       | 1.7 | 0.0008 | 0.9527 | 72  | ENSG00000238       | -1.6  | 0.020 | 0.9527 |
| 22                                       | miR-4768-3p        | 1.7 | 0.0228 | 0.9527 | 73  | miR-218-1          | -1.6  | 0.021 | 0.9527 |
| 23                                       | miR-4436a          | 1.7 | 0.0202 | 0.9527 | 74  | miR-340-3p         | -1.6  | 0.036 | 0.9527 |
| 24                                       | miR-1183           | 1.7 | 0.0328 | 0.9527 | 75  | miR-8078           | -1.6  | 0.032 | 0.9527 |
| 25                                       | ENSG00000252       | 1.7 | 0.0045 | 0.9527 | 76  | miR-6833-3p        | -1.6  | 0.017 | 0.9527 |
| 26                                       | ENSG00000263       | 1.7 | 0.0045 | 0.9527 | 77  | ENSG00000238       | -1.6  | 0.025 | 0.9527 |
| 27                                       | ENSG00000263       | 1.7 | 0.0045 | 0.9527 | 78  | HBII-85-26         | -1.7  | 0.011 | 0.9527 |
| 28                                       | ENSG00000263       | 1.7 | 0.0045 | 0.9527 | 79  | miR-7515           | -1.7  | 0.027 | 0.9527 |
| 29                                       | ENSG00000265       | 1.7 | 0.0045 | 0.9527 | 80  | miR-631            | -1.7  | 0.048 | 0.9527 |
| 30                                       | ENSG00000265       | 1.7 | 0.0045 | 0.9527 | 81  | miR-5696           | -1.7  | 0.012 | 0.9527 |
| 31                                       | ENSG00000265       | 1.7 | 0.0045 | 0.9527 | 82  | miR-6756-5p        | -1.7  | 0.049 | 0.9527 |
| 32                                       | ENSG00000265       | 1.7 | 0.0045 | 0.9527 | 83  | miR-3921           | -1.7  | 0.013 | 0.9527 |



|                                            |                    |      |        |        |     |                    |      |       |        |
|--------------------------------------------|--------------------|------|--------|--------|-----|--------------------|------|-------|--------|
| 33                                         | miR-5088-5p        | 1.7  | 0.0212 | 0.9527 | 84  | miR-191-5p         | -1.8 | 0.037 | 0.9527 |
| 34                                         | miR-1468-3p        | 1.7  | 0.0115 | 0.9527 | 85  | miR-141-5p         | -1.8 | 0.012 | 0.9527 |
| 35                                         | ENSG00000252       | 1.7  | 0.0396 | 0.9527 | 86  | miR-638            | -1.8 | 0.036 | 0.9527 |
| 36                                         | miR-4257           | 1.6  | 0.0221 | 0.9527 | 87  | miR-5680           | -1.8 | 0.016 | 0.9527 |
| 37                                         | miR-4711-5p        | 1.6  | 0.016  | 0.9527 | 88  | ENSG00000238       | -1.9 | 0.023 | 0.9527 |
| 38                                         | miR-6865-5p        | 1.6  | 0.0445 | 0.9527 | 89  | miR-548ae-1        | -1.9 | 0.005 | 0.9527 |
| 39                                         | ENSG00000200       | 1.6  | 0.0068 | 0.9527 | 90  | hsa-let-7d-3p      | -1.9 | 0.037 | 0.9527 |
| 40                                         | miR-3153           | 1.6  | 0.0234 | 0.9527 | 91  | ENSG00000239       | -2.0 | 0.007 | 0.9527 |
| 41                                         | miR-7977           | 1.6  | 0.0063 | 0.9527 | 92  | miR-3619-5p        | -2.0 | 0.009 | 0.9527 |
| 42                                         | miR-6880-5p        | 1.6  | 0.0038 | 0.9527 | 93  | miR-6729-5p        | -2.1 | 0.024 | 0.9527 |
| 43                                         | miR-4300           | 1.6  | 0.0116 | 0.9527 | 94  | miR-6776           | -2.1 | 0.037 | 0.9527 |
| 44                                         | miR-4255           | 1.6  | 0.0163 | 0.9527 | 95  | miR-6782-5p        | -2.2 | 0.006 | 0.9527 |
| 45                                         | HBII-52-32         | 1.6  | 0.0372 | 0.9527 | 96  | miR-1273g-3p       | -2.3 | 0.015 | 0.9527 |
| 46                                         | ENSG00000238       | 1.5  | 0.0086 | 0.9527 | 97  | miR-99b-5p         | -2.3 | 0.043 | 0.9527 |
| 47                                         | ENSG00000206       | 1.5  | 0.017  | 0.9527 | 98  | miR-4725-3p        | -2.3 | 0.013 | 0.9527 |
| 48                                         | miR-382-3p         | 1.5  | 0.0476 | 0.9527 | 99  | <b>miR-1915-3p</b> | -2.6 | 0.007 | 0.9527 |
| 49                                         | miR-5696           | 1.5  | 0.0069 | 0.9527 | 100 | miR-6821-5p        | -2.6 | 0.032 | 0.9527 |
| 55                                         | ENSG00000199       | 1.5  | 0.0092 | 0.9527 | 101 | miR-6500-5p        | -3.1 | 0.013 | 0.9527 |
| 51                                         | miR-551b-5p        | 1.5  | 0.0152 | 0.9527 |     |                    |      |       |        |
| <b>C. HGS compared to LGS PCa patients</b> |                    |      |        |        |     |                    |      |       |        |
| 1                                          | miR-6727-5p        | 5.17 | 0.0134 | 0.9643 | 90  | miR-4263           | 1.62 | 0.029 | 0.9643 |
| 2                                          | miR-6125           | 4.09 | 0.0036 | 0.9643 | 91  | miR-15a-3p         | 1.62 | 0.043 | 0.9643 |
| 3                                          | miR-6869-5p        | 3.96 | 0.031  | 0.9643 | 92  | miR-4521           | 1.61 | 0.014 | 0.9643 |
| 4                                          | miR-3621           | 3.94 | 0.0261 | 0.9643 | 93  | miR-7150           | 1.61 | 0.016 | 0.9643 |
| 5                                          | miR-6858-5p        | 3.39 | 0.0262 | 0.9643 | 94  | miR-4686           | 1.6  | 0.013 | 0.9643 |
| 6                                          | miR-5189-5p        | 3.2  | 0.0017 | 0.9643 | 95  | miR-150            | 1.6  | 0.015 | 0.9643 |
| 7                                          | miR-4737           | 2.86 | 0.0023 | 0.9643 | 96  | ENSG00000238       | 1.6  | 0.024 | 0.9643 |
| 8                                          | miR-5094           | 2.84 | 0.0011 | 0.9643 | 97  | miR-6862-5p        | 1.6  | 0.037 | 0.9643 |
| 9                                          | <b>miR-3692-3p</b> | 2.82 | 0.0019 | 0.9643 | 98  | miR-6811           | 1.6  | 0.039 | 0.9643 |
| 10                                         | ENSG00000238       | 2.82 | 0.0188 | 0.9643 | 99  | miR-221            | 1.6  | 0.045 | 0.9643 |
| 11                                         | miR-4269           | 2.79 | 0.0189 | 0.9643 | 100 | ENSG00000252       | 1.6  | 0.047 | 0.9643 |
| 12                                         | miR-6741-5p        | 2.71 | 0.0089 | 0.9643 | 101 | miR-3972           | 1.59 | 0.014 | 0.9643 |
| 13                                         | miR-1469           | 2.71 | 0.013  | 0.9643 | 102 | ENSG00000238       | 1.59 | 0.046 | 0.9643 |
| 14                                         | miR-4737           | 2.66 | 0.0032 | 0.9643 | 103 | miR-6837-3p        | 1.57 | 0.017 | 0.9643 |
| 15                                         | miR-574-3p         | 2.49 | 0.0025 | 0.9643 | 104 | miR-4796-5p        | 1.57 | 0.020 | 0.9643 |
| 16                                         | miR-6723-5p        | 2.47 | 0.0075 | 0.9643 | 105 | 14qI-4             | 1.56 | 0.013 | 0.9643 |
| 17                                         | miR-196b-3p        | 2.45 | 0.0058 | 0.9643 | 106 | miR-5195-5p        | 1.56 | 0.014 | 0.9643 |
| 18                                         | miR-378h           | 2.42 | 0.0018 | 0.9643 | 107 | ENSG00000212       | 1.56 | 0.017 | 0.9643 |
| 19                                         | miR-6786-5p        | 2.3  | 0.0203 | 0.9643 | 108 | miR-1273h-3p       | 1.56 | 0.019 | 0.9643 |
| 20                                         | miR-3935           | 2.3  | 0.0339 | 0.9643 | 109 | ENSG00000206       | 1.56 | 0.025 | 0.9643 |
| 21                                         | miR-187-5p         | 2.27 | 0.0035 | 0.9643 | 110 | miR-6820-3p        | 1.56 | 0.047 | 0.9643 |
| 22                                         | miR-5703           | 2.26 | 0.003  | 0.9643 | 111 | miR-363            | 1.55 | 0.046 | 0.9643 |
| 23                                         | miR-7975           | 2.23 | 0.0374 | 0.9643 | 112 | miR-548aq          | 1.55 | 0.048 | 0.9643 |
| 24                                         | <b>miR-3939</b>    | 2.22 | 0.0017 | 0.9643 | 113 | miR-1247-3p        | 1.54 | 0.018 | 0.9643 |

|    |              |      |        |        |     |              |       |       |        |
|----|--------------|------|--------|--------|-----|--------------|-------|-------|--------|
| 25 | miR-635      | 2.2  | 0.0086 | 0.9643 | 114 | ENSG00000238 | 1.54  | 0.021 | 0.9643 |
| 26 | miR-3126-3p  | 2.19 | 0.0049 | 0.9643 | 115 | miR-4776-5p  | 1.54  | 0.037 | 0.9643 |
| 27 | miR-770-5p   | 2.12 | 0.0044 | 0.9643 | 116 | miR-3160-2   | 1.53  | 0.018 | 0.9643 |
| 28 | ENSG00000239 | 2.06 | 0.0247 | 0.9643 | 117 | miR-3150b-5p | 1.53  | 0.045 | 0.9643 |
| 29 | miR-140-3p   | 2.04 | 0.0418 | 0.9643 | 118 | miR-6765-3p  | 1.52  | 0.027 | 0.9643 |
| 30 | miR-4454     | 2.01 | 0.0161 | 0.9643 | 119 | miR-219b     | 1.5   | 0.035 | 0.9643 |
| 31 | miR-5092     | 2.01 | 0.0266 | 0.9643 | 120 | miR-4304     | -1.5  | 0.044 | 0.9643 |
| 32 | miR-3154     | 2.01 | 0.0397 | 0.9643 | 121 | miR-5087     | -1.51 | 0.020 | 0.9643 |
| 33 | miR-6828     | 1.99 | 0.002  | 0.9643 | 122 | HBII-52-34   | -1.51 | 0.035 | 0.9643 |
| 34 | miR-5704     | 1.99 | 0.0062 | 0.9643 | 123 | miR-376b-3p  | -1.51 | 0.043 | 0.9643 |
| 35 | miR-3648     | 1.98 | 0.0058 | 0.9643 | 124 | HBI-115      | -1.52 | 0.022 | 0.9643 |
| 36 | miR-8089     | 1.98 | 0.0067 | 0.9643 | 125 | ENSG00000238 | -1.52 | 0.023 | 0.9643 |
| 37 | miR-92b-5p   | 1.97 | 0.021  | 0.9643 | 126 | miR-888      | -1.52 | 0.026 | 0.9643 |
| 38 | miR-8074     | 1.95 | 0.0026 | 0.9643 | 127 | miR-3674     | -1.52 | 0.032 | 0.9643 |
| 39 | ENSG00000238 | 1.94 | 0.011  | 0.9643 | 128 | ENSG00000200 | -1.52 | 0.040 | 0.9643 |
| 40 | miR-2467-3p  | 1.91 | 0.0486 | 0.9643 | 129 | ENSG00000252 | -1.52 | 0.046 | 0.9643 |
| 41 | miR-6078     | 1.9  | 0.0045 | 0.9643 | 130 | miR-5682     | -1.53 | 0.02  | 0.9643 |
| 42 | miR-4718     | 1.89 | 0.0271 | 0.9643 | 131 | miR-2116-5p  | -1.53 | 0.020 | 0.9643 |
| 43 | ENSG00000252 | 1.88 | 0.0198 | 0.9643 | 132 | miR-556-5p   | -1.53 | 0.022 | 0.9643 |
| 44 | ENSG00000262 | 1.88 | 0.0198 | 0.9643 | 133 | miR-374c     | -1.53 | 0.028 | 0.9643 |
| 45 | ENSG00000238 | 1.88 | 0.0361 | 0.9643 | 134 | miR-7973-2   | -1.53 | 0.040 | 0.9643 |
| 46 | ENSG00000264 | 1.87 | 0.004  | 0.9643 | 135 | miR-8077     | -1.54 | 0.024 | 0.9643 |
| 47 | ENSG00000264 | 1.85 | 0.0034 | 0.9643 | 136 | ENSG00000238 | -1.54 | 0.028 | 0.9643 |
| 48 | miR-2277-5p  | 1.85 | 0.0046 | 0.9643 | 137 | miR-6740-5p  | -1.54 | 0.044 | 0.9643 |
| 49 | miR-188      | 1.85 | 0.0334 | 0.9643 | 138 | miR-5708     | -1.55 | 0.016 | 0.9643 |
| 50 | miR-4740     | 1.84 | 0.0378 | 0.9643 | 139 | miR-4765     | -1.55 | 0.032 | 0.9643 |
| 51 | miR-6879-5p  | 1.82 | 0.0177 | 0.9643 | 140 | miR-544b     | -1.56 | 0.013 | 0.9643 |
| 52 | miR-937-3p   | 1.81 | 0.0139 | 0.9643 | 141 | ENSG00000252 | -1.56 | 0.013 | 0.9643 |
| 53 | miR-1913     | 1.8  | 0.0048 | 0.9643 | 142 | miR-4327     | -1.56 | 0.020 | 0.9643 |
| 54 | miR-6072     | 1.78 | 0.0043 | 0.9643 | 143 | ENSG00000252 | -1.57 | 0.012 | 0.9643 |
| 55 | ENSG00000239 | 1.78 | 0.0079 | 0.9643 | 144 | miR-4669     | -1.57 | 0.025 | 0.9643 |
| 56 | miR-6876-5p  | 1.78 | 0.0133 | 0.9643 | 145 | miR-3663-3p  | -1.57 | 0.033 | 0.9643 |
| 57 | miR-1229-3p  | 1.78 | 0.03   | 0.9643 | 146 | miR-6776-5p  | -1.58 | 0.013 | 0.9643 |
| 58 | miR-8072     | 1.77 | 0.0336 | 0.9643 | 147 | miR-3153     | -1.58 | 0.016 | 0.9643 |
| 59 | ENSG00000212 | 1.77 | 0.044  | 0.9643 | 148 | ENSG00000238 | -1.59 | 0.013 | 0.9643 |
| 60 | miR-3150b    | 1.77 | 0.0467 | 0.9643 | 149 | miR-516a-1   | -1.59 | 0.046 | 0.9643 |
| 61 | miR-6851     | 1.76 | 0.009  | 0.9643 | 150 | miR-516a-2   | -1.59 | 0.046 | 0.9643 |
| 62 | ENSG00000238 | 1.75 | 0.0105 | 0.9643 | 151 | miR-3155b    | -1.61 | 0.011 | 0.9643 |
| 63 | miR-187      | 1.75 | 0.0109 | 0.9643 | 152 | miR-1178-5p  | -1.61 | 0.023 | 0.9643 |
| 64 | miR-3687     | 1.75 | 0.0183 | 0.9643 | 153 | miR-20a-5p   | -1.65 | 0.049 | 0.9643 |
| 65 | miR-4786     | 1.73 | 0.0109 | 0.9643 | 154 | HBII-52-33   | -1.66 | 0.014 | 0.9643 |
| 66 | miR-489-3p   | 1.73 | 0.0313 | 0.9643 | 155 | miR-3925     | -1.67 | 0.040 | 0.9643 |
| 67 | miR-6850-3p  | 1.72 | 0.0198 | 0.9643 | 156 | miR-4731-3p  | -1.69 | 0.013 | 0.9643 |
| 68 | miR-941-1    | 1.72 | 0.0352 | 0.9643 | 157 | miR-342-3p   | -1.73 | 0.041 | 0.9643 |

|    |              |      |        |        |     |               |       |       |        |
|----|--------------|------|--------|--------|-----|---------------|-------|-------|--------|
| 69 | miR-941-2    | 1.72 | 0.0352 | 0.9643 | 158 | miR-142-5p    | -1.76 | 0.025 | 0.9643 |
| 70 | miR-941-3    | 1.72 | 0.0352 | 0.9643 | 159 | miR-204-3p    | -1.76 | 0.041 | 0.9643 |
| 71 | miR-941-4    | 1.72 | 0.0352 | 0.9643 | 160 | miR-4471      | -1.77 | 0.034 | 0.9643 |
| 72 | miR-4706     | 1.71 | 0.0255 | 0.9643 | 161 | mgU12-22-U4-8 | -1.78 | 0.024 | 0.9643 |
| 73 | miR-504-3p   | 1.71 | 0.0482 | 0.9643 | 162 | miR-6769b-5p  | -1.8  | 0.021 | 0.9643 |
| 74 | miR-4442     | 1.7  | 0.0128 | 0.9643 | 163 | miR-4293      | -1.84 | 0.029 | 0.9643 |
| 75 | miR-4753     | 1.7  | 0.0351 | 0.9643 | 164 | miR-3160-3p   | -1.84 | 0.031 | 0.9643 |
| 76 | miR-3155a    | 1.67 | 0.0128 | 0.9643 | 165 | gi:555853     | -1.85 | 0.029 | 0.9643 |
| 77 | miR-4279     | 1.67 | 0.0168 | 0.9643 | 166 | miR-370-3p    | -1.89 | 0.012 | 0.9643 |
| 78 | ENSG00000207 | 1.67 | 0.0275 | 0.9643 | 167 | miR-1182      | -1.98 | 0.022 | 0.9643 |
| 79 | miR-147b     | 1.65 | 0.0197 | 0.9643 | 168 | miR-758-5p    | -2.04 | 0.046 | 0.9643 |
| 80 | miR-4645     | 1.65 | 0.0242 | 0.9643 | 169 | miR-4504      | -2.05 | 0.004 | 0.9643 |
| 81 | miR-4507     | 1.65 | 0.0354 | 0.9643 | 170 | miR-6837-5p   | -2.15 | 0.038 | 0.9643 |
| 82 | miR-193b-5p  | 1.64 | 0.0249 | 0.9643 | 171 | miR-107       | -2.17 | 0.003 | 0.9643 |
| 83 | miR-6805     | 1.63 | 0.0089 | 0.9643 | 172 | miR-658       | -2.28 | 0.000 | 0.9643 |
| 84 | miR-153-2    | 1.63 | 0.0282 | 0.9643 | 173 | miR-3174      | -2.38 | 0.047 | 0.9643 |
| 85 | miR-4638-3p  | 1.63 | 0.0386 | 0.9643 | 174 | miR-320a      | -2.44 | 0.005 | 0.9643 |
| 86 | miR-411-5p   | 1.63 | 0.0437 | 0.9643 | 175 | miR-320b      | -3.1  | 0.004 | 0.9643 |
| 87 | miR-7-2-3p   | 1.62 | 0.0131 | 0.9643 | 176 | miR-642a-3p   | -3.33 | 0.013 | 0.9643 |
| 88 | miR-2114     | 1.62 | 0.0186 | 0.9643 | 177 | hsa-let-7b-5p | -5    | 0.039 | 0.9643 |
| 89 | miR-4417     | 1.62 | 0.0194 | 0.9643 | 178 | miR-106b-5p   | -5.79 | 0.029 | 0.9643 |

Bold miR: selected sEV-associated miRs to be validated by qPCR; FC: fold change at 1.5; Val: value; FDR: false discovery rate

**Table S5.** Diagnostic ability of individual and combined circulating small extracellular vesicle-associated miRs (Log2FC\*) to segregate Gleason Scores of AA and CA PCa patients (Washington cohort).

| Groups            | Predictor        | miR                                 | Cut-off<br>value | Sensitiv<br>y | Specificit<br>y | AUC   | 95% CI |       | p-<br>value |
|-------------------|------------------|-------------------------------------|------------------|---------------|-----------------|-------|--------|-------|-------------|
|                   |                  |                                     |                  |               |                 |       | Lower  | Upper |             |
| AAHGS vs<br>CAHGS | Single miR       | miR-3692-3p                         | -0.680           | 71%           | 64%             | 0.719 | 0.526  | 0.913 | 0.048       |
| AAHGS vs<br>CALGS | Single miR       | miR-3692-3p<br>(ΔCT)*               | 1.475            | 79%           | 69%             | 0.776 | 0.584  | 0.967 | 0.013       |
| AALGS vs<br>CAHGS | Single miR       | miR-5189-5p                         | -0.025           | 73%           | 67%             | 0.709 | 0.520  | 0.898 | 0.051       |
|                   |                  | miR-3939                            | -0.280           | 79%           | 60%             | 0.752 | 0.576  | 0.926 | 0.021       |
|                   |                  | miR-1915-3p                         | -0.140           | 73%           | 60%             | 0.782 | 0.619  | 0.946 | 0.008       |
|                   |                  | miR-3692-3p                         | -0.745           | 71%           | 50%             | 0.702 | 0.506  | 0.897 | 0.070       |
|                   |                  | miR-6716-5p                         | -0.740           | 87%           | 50%             | 0.712 | 0.523  | 0.900 | 0.052       |
|                   | Combined<br>miRs | miR-1915-3p & miR-6716-5p           |                  |               |                 | 0.843 | 0.692  | 0.993 | 0.002       |
|                   |                  | miR-1915-3p & miR-3939              |                  |               |                 | 0.814 | 0.657  | 0.971 | 0.004       |
|                   |                  | miR-1915-3p, miR-3939 & miR-6716-5p |                  |               |                 | 0.883 | 0.751  | 1.000 | 0.001       |
|                   | AALGS vs CALGS   | Single miR                          | miR-5189-5p      | -0.855        | 87%             | 60%   | 0.720  | 0.520 | 0.912       |
| miR-3939          |                  |                                     | -0.290           | 79%           | 67%             | 0.812 | 0.658  | 0.966 | 0.004       |
| miR-1915-3p       |                  |                                     | -0.900           | 80%           | 67%             | 0.776 | 0.605  | 0.946 | 0.010       |
| miR-3692-3p       |                  |                                     | -0.525           | 79%           | 57%             | 0.719 | 0.526  | 0.913 | 0.048       |
| miR-6716-5p       |                  |                                     | -0.785           | 87%           | 79%             | 0.795 | 0.620  | 0.970 | 0.007       |
| Combined<br>miRs  |                  | miR-3939 & miR-3692-3p              |                  |               |                 | 0.863 | 0.728  | 0.997 | 0.001       |
|                   |                  | miR-3692-3p & miR-6716-5p           |                  |               |                 | 0.824 | 0.665  | 0.984 | 0.004       |
|                   |                  | miR-1915-3p, miR-3692 & miR-6716-5p |                  |               |                 | 0.888 | 0.762  | 1.000 | 0.001       |
| AAHGS vs<br>AALGS |                  | Single miR                          | miR-3939         | 0.695         | 92%             | 50%   | 0.730  | 0.536 | 0.923       |
|                   | miR-1915-3p      |                                     | -0.295           | 73%           | 87%             | 0.847 | 0.709  | 0.984 | 0.001       |
|                   | miR-3692-3p      |                                     | -0.640           | 71%           | 86%             | 0.860 | 0.726  | 0.995 | 0.001       |
|                   | Combined<br>miRs | miR-1915-3p & miR-3692-3p           |                  |               |                 |       | 0.872  | 0.746 | 0.999       |

AAHGS: AA men with high Gleason score; CAHGS: Caucasian men with high Gleason score; AALGS: AA men with low Gleason score; CALGS: CA men with low Gleason score

**Table S6.** Diagnostic ability of individual and combined circulating small extracellular vesicle-associated miRs (Log2FC\*) to segregate Gleason Scores of AA and CA PCa patients (NIH cohort).

| Groups         | Predictor     | microRNA                                | Cut-off | Sensitivity | Specificity | AUC   | 95% CI |       | p-value |
|----------------|---------------|-----------------------------------------|---------|-------------|-------------|-------|--------|-------|---------|
|                |               |                                         |         |             |             |       | Lower  | Upper |         |
| AAHGS vs AALGS | Single miR    | miR-1915-3p                             | 0.875   | 0.930       | 0.500       | 0.773 | 0.600  | 0.946 | 0.041   |
|                |               | miR-3692-                               | -0.325  | 0.790       | 0.770       | 0.764 | 0.581  | 0.948 | 0.015   |
|                |               | miR-5001-                               | 0.400   | 0.730       | 0.600       | 0.744 | 0.565  | 0.924 | 0.023   |
|                |               | miR-6716-                               | -0.635  | 0.600       | 0.850       | 0.692 | 0.490  | 0.894 | 0.089   |
|                | Combined miRs | miR-1915-3p & miR-3692-3p               |         |             |             | 0.923 | 0.814  | 1.000 | <0.001  |
|                |               | miR-1915-3p, -3692, -5001-5p & -6716-5p |         |             |             | 1.000 | 1.000  | 1.000 | <0.001  |
| AAHGS vs AAGS7 | Single miR    | miR-3692-3p                             | -0.115  | 0.860       | 0.530       | 0.719 | 0.531  | 0.907 | 0.045   |
| AAHGS vs CALGS | Single miR    | miR5001-                                | 0.585   | 0.600       | 0.600       | 0.669 | 0.474  | 0.863 | 0.115   |
|                |               | miR-6716-                               | -0.650  | 0.600       | 0.850       | 0.751 | 0.564  | 0.939 | 0.024   |
|                | Combined      | miR-5001-5p & miR-6716-5p               |         |             |             | 0.795 | 0.623  | 0.967 | 0.008   |
| AALGS vs AAGS7 | Single miR    | miR-5189-                               | -0.158  | 0.870       | 0.670       | 0.760 | 0.584  | 0.936 | 0.015   |
|                |               | miR-1915-                               | 1.705   | 0.710       | 0.600       | 0.752 | 0.575  | 0.930 | 0.021   |
|                |               | miR-5001-                               | 0.895   | 0.930       | 0.800       | 0.862 | 0.709  | 1.000 | 0.001   |
|                |               | miR-6716-                               | -0.705  | 0.770       | 0.730       | 0.797 | 0.626  | 0.969 | 0.008   |
|                | Combined miRs | miR-5001-5p & miR-6716-5p               |         |             |             | 0.831 | 0.658  | 1.000 | 0.003   |
|                |               | miR-5001-5p, miR-5189 & miR-6716-5p     |         |             |             | 0.872 | 0.717  | 1.000 | 0.001   |
|                |               | miR-1915-3p, -5001-5p, -5189 & -6716-5p |         |             |             | 0.889 | 0.742  | 1.000 | 0.001   |
| AALGS vs CAHGS | Single miR    | miR-1915-                               | 0.995   | 0.500       | 0.860       | 0.681 | 0.474  | 0.889 | 0.103   |
|                |               | miR-3692-                               | -0.305  | 0.730       | 0.740       | 0.884 | 0.707  | 0.982 | 0.001   |
|                | Combined      | miR-1915-3p & miR-3692-3p               |         |             |             | 0.985 | 0.949  | 1.000 | <0.001  |
| AALGS vs       | Single        | miR-3692-                               | -1.550  | 0.670       | 0.790       | 0.710 | 0.515  | 0.909 | 0.055   |
|                | Combined      | miR-1915-3p & miR-3692                  |         |             |             | 0.890 | 0.770  | 1.000 | 0.001   |
| AALGS vs       | Single        | miR-3692-                               | -1.450  | 0.670       | 0.800       | 0.793 | 0.629  | 0.957 | 0.006   |
|                | Combined      | miR-1915-3p & miR-3692                  |         |             |             | 0.910 | 0.807  | 1.000 | <0.001  |
| AAGS7 vs CALGS | Single miR    | miR-5001-                               | 0.870   | 0.800       | 0.800       | 0.798 | 0.633  | 0.962 | 0.005   |
|                |               | miR-6716-                               | -0.705  | 0.730       | 0.770       | 0.815 | 0.649  | 0.983 | 0.005   |
|                | Combined      | miR-5001-5p & miR-6716-5p               |         |             |             | 0.851 | 0.705  | 0.998 | 0.002   |
| AAGS7 vs CAGS7 | Single miR    | miR-3692-                               | -0.080  | 0.530       | 0.930       | 0.751 | 0.576  | 0.927 | 0.019   |
|                |               | miR-6716-                               | -0.205  | 0.600       | 0.870       | 0.740 | 0.560  | 0.920 | 0.025   |
|                | Combined      | miR-3692-3p & miR-6716-5p               |         |             |             | 0.747 | 0.568  | 0.926 | 0.021   |
| AAGS7 vs CAHGS | Single miR    | miR-3692-                               | -1.115  | 0.930       | 0.600       | 0.818 | 0.666  | 0.970 | 0.003   |
|                |               | miR-5001-                               | 0.915   | 0.800       | 0.730       | 0.796 | 0.629  | 0.962 | 0.006   |
|                |               | miR-6716-                               | -0.910  | 0.870       | 0.670       | 0.789 | 0.625  | 0.953 | 0.007   |
|                | Combined      | miR-3692-3p & miR-5001-5p               |         |             |             | 0.827 | 0.682  | 0.971 | 0.002   |
|                |               | miR-3692-3p, -5001-5p & -6716-          |         |             |             | 0.831 | 0.687  | 0.975 | 0.002   |

AAHGS: AA men with high Gleason score; CAHGS: Caucasian men with high Gleason score

AALGS: AA men with low Gleason score; CALGS: CA men with low Gleason score

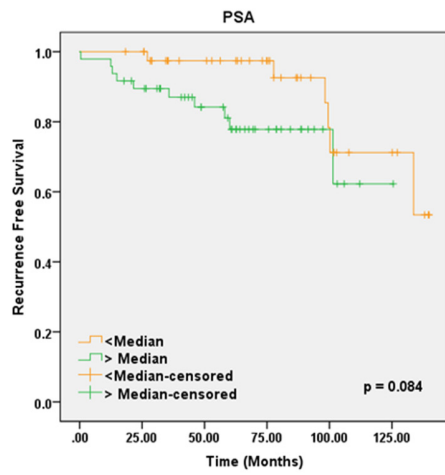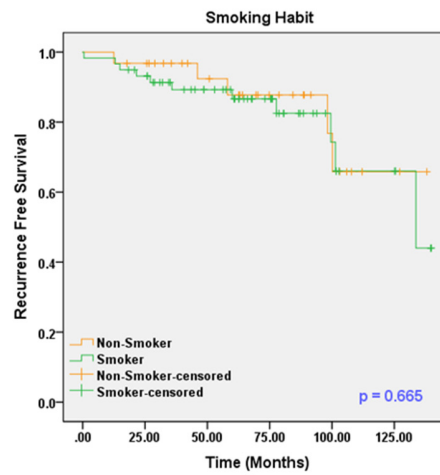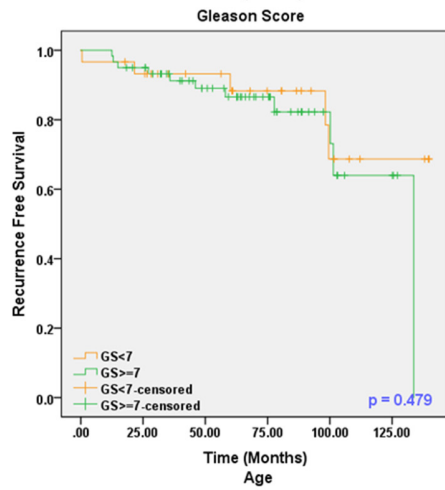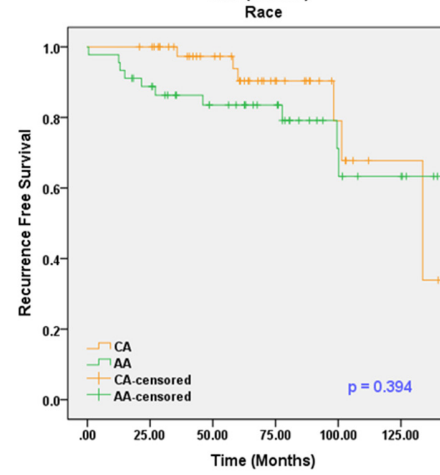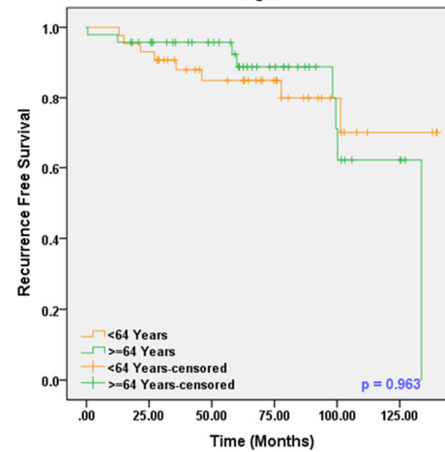



**Figure S1. Expression of surface markers proteins in small extracellular (sEVs) vesicles derived from plasma of PCa patients.** Western blot was performed on sEVs derived from plasma collected from AA and CA patients. The membrane was incubated with anti-CD63, CD9 and CD81 antibodies. Plasma free from sEVs was used as a negative control. The developed signal was visualized at low and high exposure times.

**Figure S2. Pathway prediction for small extracellular vesicle-associated miR-3201, miR-5001-5p, miR-6068, miR-6716-5p, miR-1915-3p, miR-3944-5p, miR-3939, miR-3692-3p, and miR-5189-5p.** Pathway prediction was performed for sEV-associated miRs that can discriminate PCa patients from normal individuals (A), Gleason score (B) and race (C).

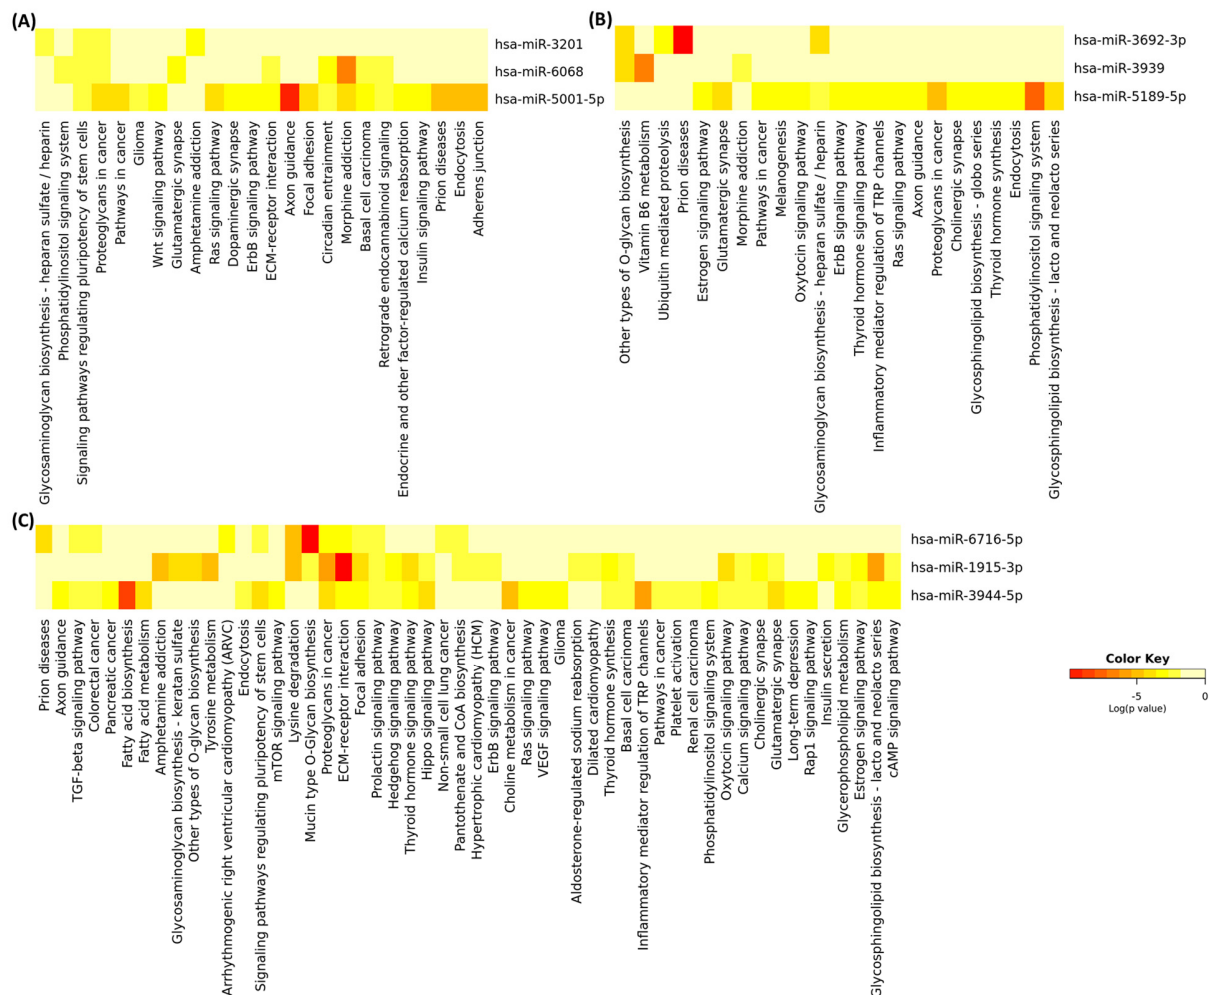

**Figure S3: Overall survival analysis for prostate cancer patients with different clinicopathological features.** Kaplan-Meier analysis shows no association between the tested parameters and the overall survival of PCa patients. The  $p$ -value was obtained by the log-rank test of the Kaplan-Meier curve.

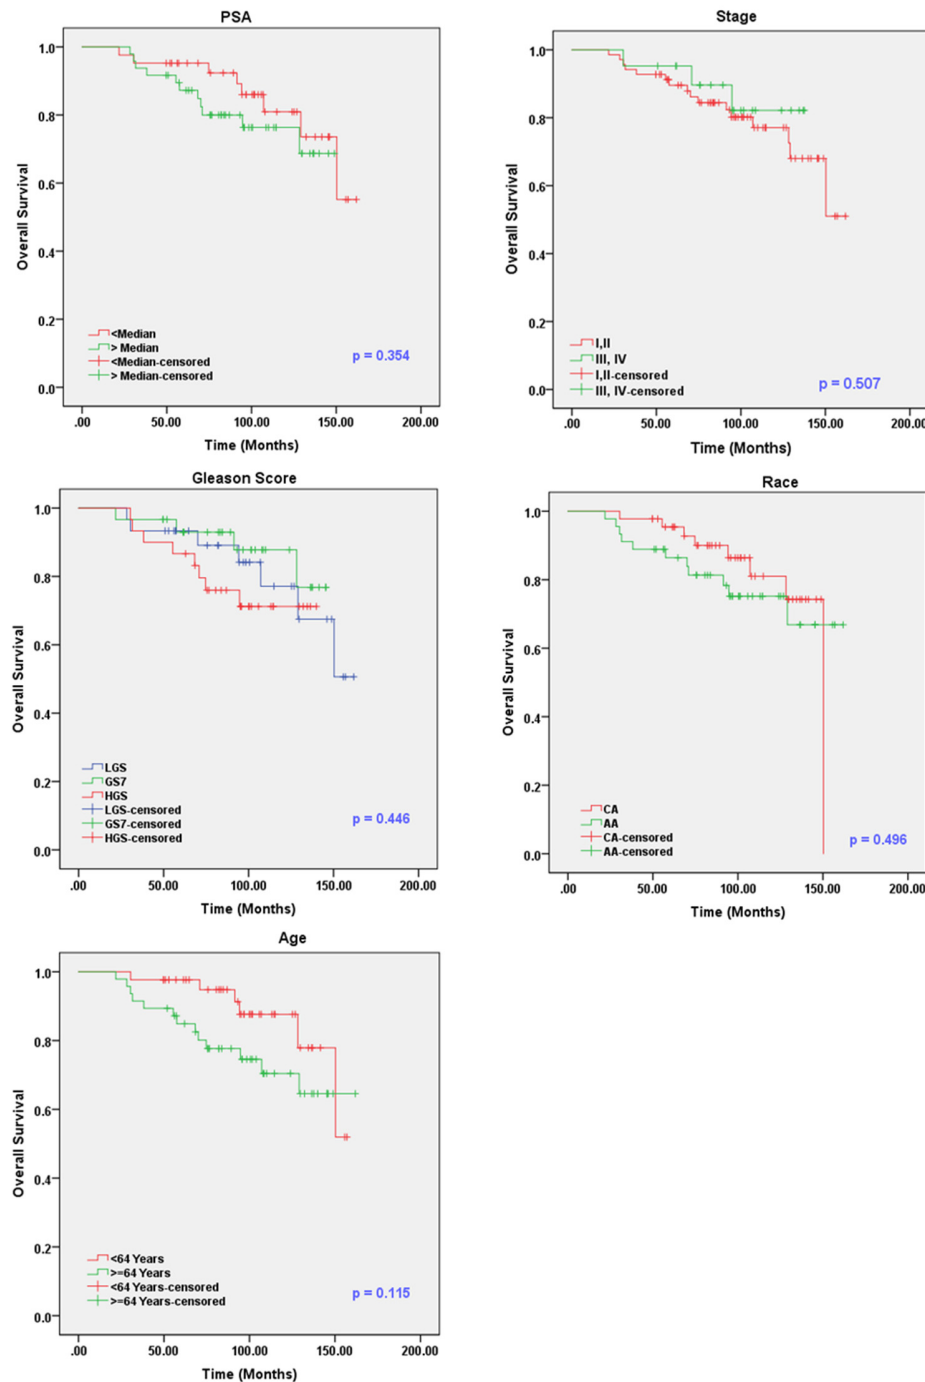

**Figure S4. Recurrence-free survival analysis for prostate cancer patients with different clinicopathological features.** Kaplan-Meier analysis shows no association between the tested parameters and the recurrence-free survival of PCa patients. The *p*-value was obtained by the log-rank test of the Kaplan-Meier curve.

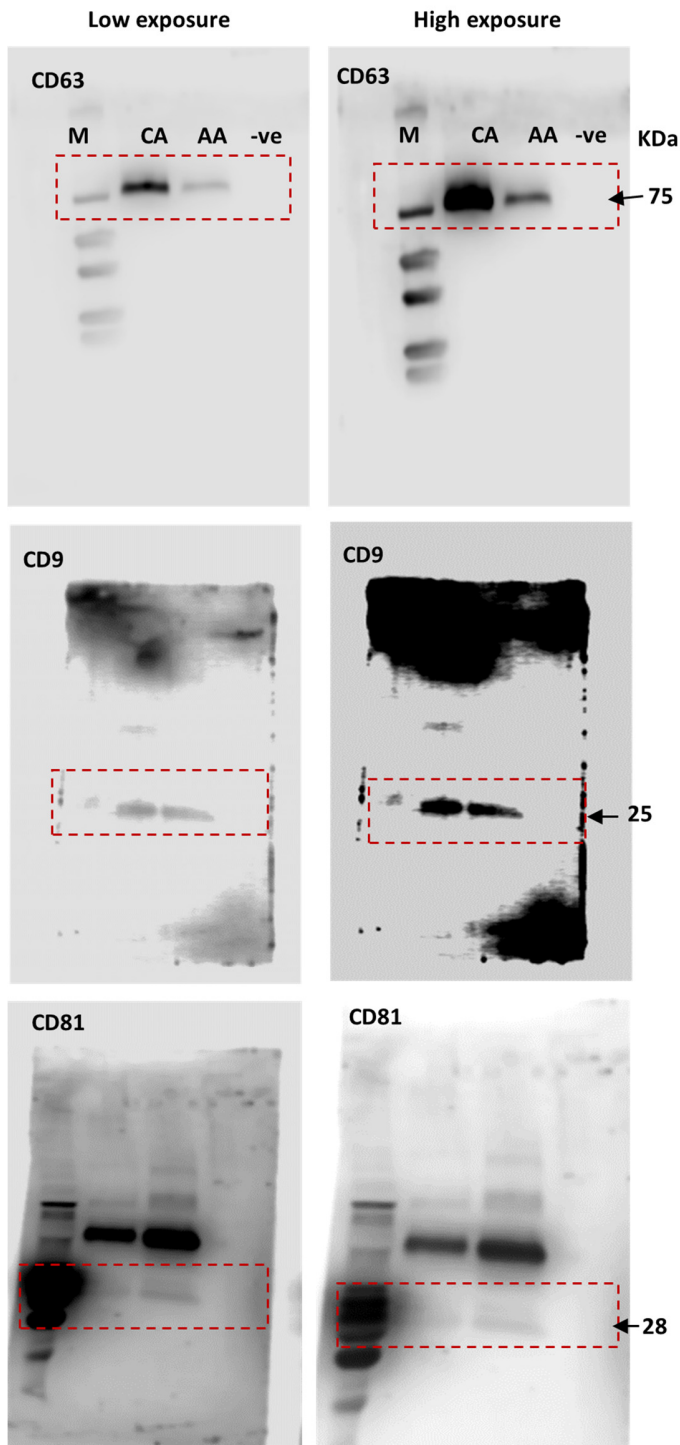

Supplement: s1 [file s1]
